# Supplementary material
Source: Springer Nature journal article supplement (https://www.springermedizin.de/resource/supplementary/12933_2005_38_MOESM3_ESM.pdf/9539486)

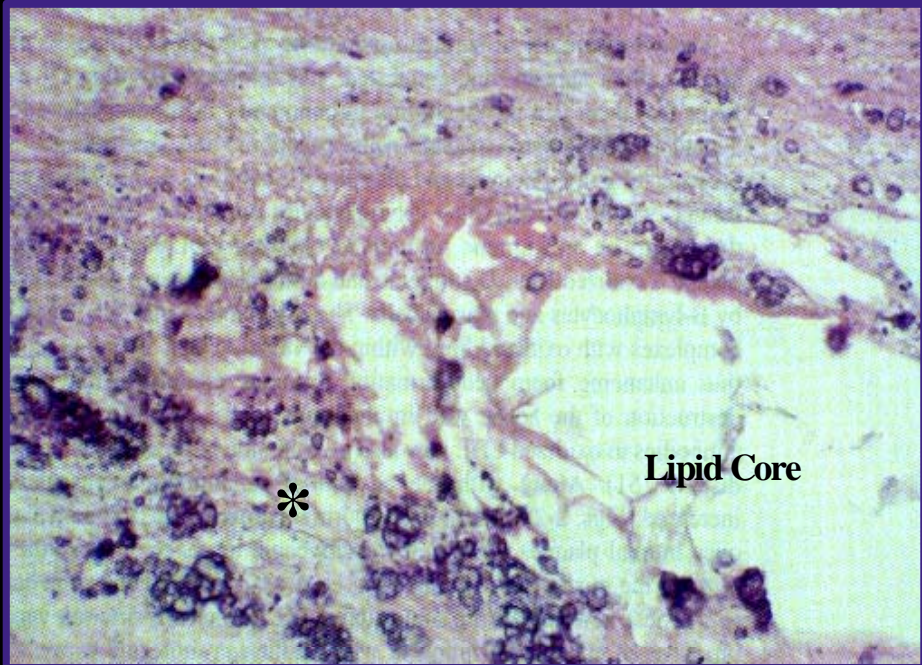

**Lipid Core**

\*

Supplement: MOESM3 [file 9539486]
